# Supplementary material for: Educational and social inequalities and cause-specific mortality: a prospective study in two municipalities of Mexico City
Source: PubMed Central journal article supplement (PMC7615266; doi:10.1016/s2468-2667(23)00153-6), 2023-09
Supplement: EMS181802-supplement-Supplementary_Materials.pdf [file EMS181802-supplement-Supplementary_Materials.pdf]

# Educational and social inequalities and cause-specific mortality: a prospective study in two municipalities of Mexico City

## Online Supplemental Material, Table of Contents

| <b>Supplementary tables</b>                                                                                                                           | <b>Page</b> |
|-------------------------------------------------------------------------------------------------------------------------------------------------------|-------------|
| Table S1. Number of deaths at ages 35-74 years, by underlying cause (ICD-10 code)                                                                     | 2           |
| Table S2. Baseline characteristics of residents of Coyoacán and Iztapalapa aged 35-74 years by education at recruitment                               | 4           |
| Table S3. Education reported at baseline and resurvey among 2971 men and 6970 women resurveyed 16 years later                                         | 5           |
| Table S4. Relevance of education to mortality from any cause at ages 35–74 years during the first 10 years of follow-up vs. subsequent years combined | 6           |
| Table S5. Associations of education with all-cause and cause-specific mortality after adjustment for potential mediators                              | 7           |
| Table S6. Baseline characteristics of 46 674 men aged 35-74 years by reported income at recruitment                                                   | 8           |
| <b>Supplementary figures</b>                                                                                                                          |             |
| Figure S1. Relevance of education to mortality from any cause at ages 35–74 years, by sex                                                             | 9           |
| Figure S2. Relevance of education to cause-specific mortality among women at ages 35–74 years                                                         | 10          |
| Figure S3. Relevance of education to cause-specific mortality among men at ages 35–74 years                                                           | 11          |
| Figure S4. Relevance of education to mortality from any cause at ages 75–84 years                                                                     | 12          |
| Figure S5. Relevance of education to cause-specific mortality at ages 75–84 years                                                                     | 13          |
| Figure S6. Relevance of income to mortality from any cause among men at ages 35–74 years                                                              | 14          |
| Figure S7. Relevance of income to cause-specific mortality among men at ages 35–74 years                                                              | 15          |
| Figure S8. Relevance of Social Development Index to mortality from any cause at ages 35–74 years                                                      | 16          |
| Figure S9. Relevance of Social Development Index to mortality from any cause at ages 35–74 years, by sex                                              | 17          |
| Figure S10. Relevance of Social Development Index to cause-specific mortality at ages 35–74 years                                                     | 18          |

**Table S1. Number of deaths at ages 35-74 years, by underlying cause (ICD-10 code)**

| <b>Underlying cause of death</b> | <b>ICD-10 codes (and number of deaths)</b>                                                                                                                                                                                                                                                                                                                                                                                                                                                                                                                                                                                                                                                                                                                                                                                                                                                                                                                                                                                                                                                                                                                                                                                                                                                                                                                                                                                                                                                                                                                                                                                                                           |
|----------------------------------|----------------------------------------------------------------------------------------------------------------------------------------------------------------------------------------------------------------------------------------------------------------------------------------------------------------------------------------------------------------------------------------------------------------------------------------------------------------------------------------------------------------------------------------------------------------------------------------------------------------------------------------------------------------------------------------------------------------------------------------------------------------------------------------------------------------------------------------------------------------------------------------------------------------------------------------------------------------------------------------------------------------------------------------------------------------------------------------------------------------------------------------------------------------------------------------------------------------------------------------------------------------------------------------------------------------------------------------------------------------------------------------------------------------------------------------------------------------------------------------------------------------------------------------------------------------------------------------------------------------------------------------------------------------------|
| CARDIAC<br>(n=2585)              | I011 (1), I018 (1), I050 (3), I051 (2), I059 (22), I069 (2), I070 (1), I071 (2), I079 (2), I080 (3), I081 (1), I091 (1), I099 (17), I110 (110), I119 (10), I200 (4), I209 (3), I210 (21), I211 (12), I213 (1), I219 (1870), I220 (1), I221 (1), I249 (12), I251 (50), I252 (1), I255 (1), I258 (9), I259 (97), I270 (7), I272 (2), I279 (8), I301 (1), I319 (1), I330 (6), I340 (4), I348 (1), I350 (12), I351 (1), I358 (2), I38X (9), I420 (12), I421 (1), I426 (2), I429 (2), I442 (11), I443 (1), I460 (1), I469 (10), I471 (4), I472 (3), I480 (1), I489 (4), I48X (8), I490 (7), I499 (5), I500 (57), I501 (14), I509 (78), I515 (2), I518 (4), I519 (11), Q210 (1), Q213 (1), Q231 (1), Q238 (1), Q248 (1), R570 (27)                                                                                                                                                                                                                                                                                                                                                                                                                                                                                                                                                                                                                                                                                                                                                                                                                                                                                                                                         |
| STROKE<br>(n=800)                | F019 (2), I600 (2), I602 (1), I608 (2), I609 (80), I61 (1), I610 (1), I612 (2), I613 (1), I614 (1), I615 (2), I618 (1), I619 (243), I620 (9), I629 (4), I633 (4), I634 (17), I635 (3), I638 (2), I639 (60), I64X (103), I669 (6), I671 (6), I672 (2), I673 (1), I674 (4), I678 (79), I679 (120), I690 (2), I691 (1), I693 (7), I694 (5), I698 (26)                                                                                                                                                                                                                                                                                                                                                                                                                                                                                                                                                                                                                                                                                                                                                                                                                                                                                                                                                                                                                                                                                                                                                                                                                                                                                                                   |
| OTHER VASCULAR<br>(n=294)        | E115 (37), E145 (37), I260 (2), I269 (75), I710 (4), I712 (1), I713 (4), I714 (3), I718 (3), I719 (1), I729 (1), I731 (1), I739 (3), I740 (1), I741 (1), I771 (17), I776 (1), I779 (1), I802 (6), I803 (1), I822 (1), I828 (1), I829 (3), I830 (1), I839 (1), I872 (5), I879 (1), I890 (1), I99X (2), K550 (67), K551 (1), K552 (1), K559 (8), K761 (1)                                                                                                                                                                                                                                                                                                                                                                                                                                                                                                                                                                                                                                                                                                                                                                                                                                                                                                                                                                                                                                                                                                                                                                                                                                                                                                              |
| RENAL<br>(n=2153)                | E102 (11), E112 (911), E122 (1), E142 (376), I120 (109), I129 (2), I130 (3), I131 (2), I132 (29), N002 (1), N009 (2), N039 (28), N049 (2), N059 (10), N10X (2), N119 (1), N12X (8), N142 (1), N151 (12), N170 (1), N179 (82), N180 (12), N185 (30), N189 (219), N19X (59), N200 (7), N201 (1), N281 (1), N289 (3), N300 (1), N309 (1), N390 (223), Q619 (1), Y841 (1)                                                                                                                                                                                                                                                                                                                                                                                                                                                                                                                                                                                                                                                                                                                                                                                                                                                                                                                                                                                                                                                                                                                                                                                                                                                                                                |
| ACUTE DIABETIC<br>(n=557)        | E100 (3), E101 (3), E110 (174), E111 (156), E121 (1), E140 (117), E141 (97), E162 (6)                                                                                                                                                                                                                                                                                                                                                                                                                                                                                                                                                                                                                                                                                                                                                                                                                                                                                                                                                                                                                                                                                                                                                                                                                                                                                                                                                                                                                                                                                                                                                                                |
| HEPATOBIILIARY<br>(n=1140)       | B169 (5), B171 (31), B181 (2), B182 (8), B189 (1), B190 (2), B199 (2), D136 (1), I850 (17), I859 (5), K563 (1), K701 (20), K702 (1), K703 (170), K704 (24), K709 (18), K711 (2), K716 (1), K720 (9), K721 (65), K729 (204), K739 (2), K742 (1), K743 (3), K745 (2), K746 (309), K750 (14), K754 (3), K759 (2), K760 (1), K764 (1), K766 (14), K767 (15), K768 (1), K769 (17), K800 (5), K801 (9), K802 (3), K803 (4), K804 (1), K805 (3), K810 (17), K811 (4), K819 (6), K821 (1), K822 (1), K829 (6), K830 (19), K831 (3), K851 (1), K852 (4), K858 (7), K859 (37), K85X (28), K861 (3), K868 (3), Q447 (1)                                                                                                                                                                                                                                                                                                                                                                                                                                                                                                                                                                                                                                                                                                                                                                                                                                                                                                                                                                                                                                                         |
| CANCER<br>(n=2246)               | C029 (10), C049 (1), C069 (2), C07X (1), C089 (1), C109 (3), C119 (3), C139 (1), C140 (5), C142 (1), C159 (13), C160 (2), C169 (209), C170 (10), C179 (1), C182 (2), C184 (1), C187 (2), C189 (125), C19X (4), C20X (20), C220 (55), C221 (22), C229 (116), C23X (29), C240 (11), C241 (9), C248 (3), C249 (14), C250 (24), C252 (1), C259 (99), C260 (3), C269 (2), C319 (1), C329 (16), C33X (1), C349 (166), C37X (1), C382 (1), C383 (1), C384 (1), C402 (1), C411 (1), C412 (2), C414 (1), C419 (7), C435 (1), C437 (1), C438 (1), C439 (15), C444 (1), C445 (1), C447 (1), C449 (6), C450 (1), C451 (2), C457 (1), C459 (3), C469 (1), C479 (1), C480 (10), C482 (5), C490 (1), C492 (4), C495 (2), C499 (13), C509 (239), C519 (4), C530 (2), C539 (134), C541 (22), C549 (2), C55X (12), C56X (110), C609 (2), C61X (75), C629 (1), C64X (91), C66X (1), C679 (24), C680 (3), C689 (1), C709 (2), C710 (16), C711 (1), C718 (2), C719 (41), C720 (1), C729 (1), C73X (27), C741 (1), C749 (1), C759 (1), C760 (6), C761 (1), C762 (2), C763 (2), C764 (1), C765 (2), C779 (1), C780 (8), C786 (3), C787 (8), C788 (2), C793 (3), C794 (3), C795 (1), C796 (1), C798 (3), C800 (29), C809 (16), C80X (4), C817 (1), C819 (10), C822 (1), C829 (1), C833 (12), C838 (1), C839 (3), C844 (1), C845 (3), C851 (1), C857 (2), C859 (49), C900 (43), C901 (1), C902 (1), C910 (24), C911 (1), C919 (2), C920 (29), C921 (8), C927 (3), C929 (4), C950 (1), C959 (3), C97X (1), D371 (3), D372 (1), D374 (4), D376 (6), D377 (1), D380 (2), D381 (4), D383 (2), D391 (2), D397 (1), D410 (2), D419 (1), D430 (11), D432 (1), D449 (1), D486 (1), D487 (5), D489 (3) |
| RESPIRATORY<br>(n=1779)          | A162 (9), A165 (1), A169 (2), B206 (2), B440 (1), B441 (1), B909 (1), E848 (1), J069 (1), J09 (3), J100 (2), J111 (1), J129 (4), J151 (3), J157 (1), J159 (33), J180 (60), J181 (34), J182 (2), J188 (1), J189 (610), J209 (4), J22X (23), J348 (1), J391 (1), J42X (17), J439 (34), J440 (104), J441 (2), J448 (7), J449 (166), J459 (12), J46X (2), J47X (2), J60X (1), J64X (5), J677 (1), J679 (2), J680 (1), J690 (3), J80X (2), J81X (6), J841 (82), J848 (1), J849 (11), J850 (1), J852 (1), J869 (8), J90X (5), J920 (1), J939 (1), J948 (1), J960 (3), J961 (1), J969 (4), J980 (1), J981 (1), J984 (14), J985 (4), J988 (8), J989 (1), Q311 (1), U071 (240), U072 (220)                                                                                                                                                                                                                                                                                                                                                                                                                                                                                                                                                                                                                                                                                                                                                                                                                                                                                                                                                                                    |
| INFECTIVE<br>(n=857)             | A047 (3), A060 (1), A090 (18), A099 (31), A09X (12), A170 (2), A180 (1), A181 (2), A182 (1), A183 (1), A199 (3), A415 (1), A419 (214), A480 (1), A483 (1), A498 (1), A810 (2), A86X (2), B200 (1), B201 (2), B207 (3), B208 (9), B210 (2), B212 (1), B218 (1), B227 (2), B238 (6), B24X (6), B373 (1), B465 (2), B690 (2), B948 (2), B99X (1), G009 (3), G039 (4), G042 (1), G049 (7), G060 (3), H440 (1), H664 (1), K052 (1), K222 (1), K223 (2), K228 (1), K251 (3), K254 (11), K255 (12), K256 (5), K259 (6), K264 (6), K265 (3), K269 (2), K274 (3), K275 (1), K290 (6), K291 (2), K292 (1), K295 (4), K297 (1), K318 (6), K319 (1), K352 (4), K353 (4), K358 (4), K359 (2), K572 (2), K578 (8), K579 (12), K610 (4), K611 (1), K612 (1), K650 (22), K658 (2), K659 (61), K920 (27), K921 (2), K922 (126), L021 (3), L022 (6), L023 (2), L024 (2), L031 (4), L038 (1), L039 (4), L089 (36), L899 (6), L89X (5), L905 (1), L984 (7), M009 (2), M600 (2), M725 (1), M726 (16), M798 (25), M869 (3), N410 (1), N498 (7), N499 (1), N719 (1), N739 (2), N764 (1)                                                                                                                                                                                                                                                                                                                                                                                                                                                                                                                                                                                                     |
| OTHER DEFINED MEDICAL<br>(n=400) | D033 (1), D27X (1), D329 (9), D352 (1), D464 (1), D467 (1), D469 (6), D479 (1), D619 (7), D649 (4), D65X (1), D682 (1), D693 (2), D694 (1), D696 (3), D699 (3), D70X (2), D733 (1), D739 (1), D762 (1), E031 (1), E035 (1), E039 (16), E049 (1), E055 (1), E059 (3), E065 (1), E116 (3), E119 (6), E129 (1), E146 (4), E149 (7), E230 (1), E249 (2), E279 (1), E43X (1), E440 (1), E660 (1), E725 (1), E835 (1), E875 (1), E876 (1), E878 (1), E889 (2), F03X (5), F09X (1), F102 (7), F182 (1), F209 (1), G10X (6), G121 (1), G122 (18), G20X (9), G300 (1), G309 (5), G310 (1), G35X (2), G379 (1), G403 (1), G409 (12), G419 (1), G439 (1), G589 (1), G610 (5), G709 (1), G710 (2), G809 (1), G822 (1), G919 (4), G931 (12), G934 (6), G935 (1), G936 (2), G938 (1), G958 (1), G959 (1), I10X (2), K088 (1), K102 (1), K137 (1), K389 (1), K404 (1), K419 (1), K420 (4), K421 (1), K429 (1), K430 (3), K439 (2), K440 (1), K460 (2), K461 (1), K469 (3), K513 (1), K519 (1), K529 (6), K560 (1), K562 (1), K566 (36), K567 (1), K593 (5), K628 (1), K630 (1), K631 (22), K632 (4), K635 (1), K638 (2), K639 (5), K661 (1), K918 (1), K931 (1), L100 (1), L109 (1), L511 (1), L512 (2), L921 (1), L958 (1), L988 (1), M050 (1), M068 (1), M069 (16), M100 (1), M109 (1), M139 (1), M311 (2), M313 (1), M319 (1), M321 (4), M329 (3), M331 (1), M340 (1), M348 (1), M349 (1), M623 (4), M799 (1), M844 (1), M993 (1), N40X (8), N939 (1), N948 (1), O622 (1), O720 (1)                                                                                                                                                                                              |

**Table S1. Number of deaths at ages 35-74 years, by underlying cause (ICD-10 code)**

| <b>Underlying cause of death</b> | <b>ICD-10 codes (and number of deaths)</b>                                                                                                                                                                                                                                                                                                                                                                                                                                                                                                                                                                                                                                                                                                                                                                                                                                                                                                                                                                                                                                                                                                                                                                                                                                                             |
|----------------------------------|--------------------------------------------------------------------------------------------------------------------------------------------------------------------------------------------------------------------------------------------------------------------------------------------------------------------------------------------------------------------------------------------------------------------------------------------------------------------------------------------------------------------------------------------------------------------------------------------------------------------------------------------------------------------------------------------------------------------------------------------------------------------------------------------------------------------------------------------------------------------------------------------------------------------------------------------------------------------------------------------------------------------------------------------------------------------------------------------------------------------------------------------------------------------------------------------------------------------------------------------------------------------------------------------------------|
| EXTERNAL<br>(n=392)              | S729 (2), T07X (1), V011 (1), V029 (1), V041 (1), V049 (1), V051 (1), V059 (1), V093 (3), V099 (75), V182 (1), V209 (1), V299 (1), V439 (1), V489 (1), V494 (1), V496 (1), V499 (13), V580 (1), V719 (1), V785 (1), V878 (6), V892 (9), V899 (5), W018 (1), W060 (1), W100 (15), W104 (1), W105 (1), W108 (2), W126 (1), W130 (11), W134 (3), W135 (1), W138 (1), W139 (2), W170 (4), W172 (1), W174 (1), W176 (1), W178 (2), W179 (1), W18 (1), W180 (5), W181 (1), W184 (3), W188 (1), W190 (11), W194 (1), W195 (1), W199 (3), W200 (1), W206 (1), W250 (1), W314 (1), W340 (1), W370 (1), W704 (1), W744 (2), W748 (2), W769 (1), W780 (1), W789 (1), W799 (1), W849 (2), W878 (1), X09 (1), X090 (3), X094 (1), X219 (1), X314 (1), X360 (1), X459 (1), X470 (1), X590 (4), X594 (1), X598 (1), X599 (30), X640 (1), X650 (1), X680 (1), X700 (6), X702 (1), X708 (1), X740 (3), X780 (3), X800 (1), X910 (1), X912 (1), X914 (2), X950 (3), X954 (18), X955 (1), X959 (1), X990 (8), X994 (6), X999 (2), Y044 (2), Y048 (1), Y084 (1), Y094 (1), Y099 (1), Y159 (1), Y200 (1), Y240 (1), Y244 (3), Y245 (1), Y248 (1), Y249 (1), Y260 (2), Y280 (1), Y330 (1), Y334 (1), Y338 (1), Y340 (5), Y344 (4), Y346 (1), Y348 (2), Y349 (15), Y405 (1), Y579 (3), Y835 (1), Y838 (1), Y839 (5), Y846 (1) |
| UNDEFINED<br>(n=299)             | E86X (4), E870 (1), E872 (9), E874 (1), R040 (1), R100 (2), R11X (1), R190 (1), R571 (13), R579 (3), R58X (3), R64X (1), R688 (20), R69X (1), R99X (238)                                                                                                                                                                                                                                                                                                                                                                                                                                                                                                                                                                                                                                                                                                                                                                                                                                                                                                                                                                                                                                                                                                                                               |

**Table S2. Baseline characteristics of residents of Coyoacán and Iztapalapa aged 35-74 years by education at recruitment\***

|                                         | Coyoacán (58 301) |                                    |                                   |                       |                      | Iztapalapa (85 177) |                                     |                                   |                       |                      |
|-----------------------------------------|-------------------|------------------------------------|-----------------------------------|-----------------------|----------------------|---------------------|-------------------------------------|-----------------------------------|-----------------------|----------------------|
|                                         | None<br>(5 816)   | Primary -<br>incomplete<br>(9 909) | Primary -<br>complete<br>(15 097) | Secondary<br>(14 896) | Tertiary<br>(12 583) | None<br>(9 932)     | Primary -<br>incomplete<br>(17 703) | Primary -<br>complete<br>(24 563) | Secondary<br>(22 050) | Tertiary<br>(10 929) |
| Age, years †                            | 59.3 (10.0)       | 55.6 (10.2)                        | 51.5 (9.8)                        | 47.0 (9.4)            | 46.5 (9.0)           | 59.2 (10.7)         | 55.7 (10.6)                         | 50.7 (10.0)                       | 45.6 (9.2)            | 44.9 (8.6)           |
| Income, pesos/month                     | 548 (972)         | 790 (1251)                         | 1146 (2012)                       | 2009 (3156)           | 5805 (8058)          | 483 (1320)          | 706 (1344)                          | 1017 (2088)                       | 1659 (2719)           | 3893 (6105)          |
| Social Development Index ††             | 0.75 (0.08)       | 0.77 (0.10)                        | 0.80 (0.11)                       | 0.82 (0.11)           | 0.86 (0.11)          | 0.70 (0.09)         | 0.71 (0.09)                         | 0.72 (0.09)                       | 0.74 (0.09)           | 0.76 (0.09)          |
| Social security system use \$           |                   |                                    |                                   |                       |                      |                     |                                     |                                   |                       |                      |
| Social security                         |                   |                                    |                                   |                       |                      | 3395 (34%)          | 6707 (38%)                          | 9461 (39%)                        | 8391 (38%)            | 4682 (43%)           |
| Other public services                   |                   |                                    |                                   |                       |                      | 2865 (29%)          | 4552 (26%)                          | 5673 (23%)                        | 4700 (21%)            | 1269 (12%)           |
| Private/Other                           |                   |                                    |                                   |                       |                      | 2622 (26%)          | 4461 (25%)                          | 6305 (26%)                        | 6064 (28%)            | 3046 (28%)           |
| Smoking status                          |                   |                                    |                                   |                       |                      |                     |                                     |                                   |                       |                      |
| Current smoker                          | 1222 (21%)        | 2664 (27%)                         | 5083 (34%)                        | 6421 (43%)            | 5249 (42%)           | 1769 (18%)          | 4345 (25%)                          | 7549 (31%)                        | 8452 (38%)            | 4126 (38%)           |
| Ex-smoker                               | 1077 (19%)        | 1944 (20%)                         | 2865 (19%)                        | 2870 (19%)            | 2982 (24%)           | 1683 (17%)          | 3288 (19%)                          | 4362 (18%)                        | 3971 (18%)            | 2364 (22%)           |
| Never smoker                            | 3517 (60%)        | 5301 (53%)                         | 7149 (47%)                        | 5605 (38%)            | 4352 (35%)           | 6480 (65%)          | 10 070 (57%)                        | 12 652 (52%)                      | 9627 (44%)            | 4439 (41%)           |
| Drinking behaviour                      |                   |                                    |                                   |                       |                      |                     |                                     |                                   |                       |                      |
| Current drinker                         | 3230 (56%)        | 6388 (64%)                         | 10 722 (71%)                      | 11 447 (77%)          | 10 340 (82%)         | 4862 (49%)          | 10 549 (60%)                        | 16 027 (65%)                      | 15 437 (70%)          | 8117 (74%)           |
| Former drinker                          | 1137 (20%)        | 1628 (16%)                         | 1968 (13%)                        | 1579 (11%)            | 988 (8%)             | 1827 (18%)          | 2908 (16%)                          | 3292 (13%)                        | 2542 (12%)            | 991 (9%)             |
| Never drinker                           | 1449 (25%)        | 1893 (19%)                         | 2407 (16%)                        | 1870 (13%)            | 1255 (10%)           | 3243 (33%)          | 4246 (24%)                          | 5244 (21%)                        | 4071 (18%)            | 1821 (17%)           |
| Leisure-time physical activity          |                   |                                    |                                   |                       |                      |                     |                                     |                                   |                       |                      |
| None                                    | 5156 (89%)        | 8353 (84%)                         | 11 570 (77%)                      | 10 266 (69%)          | 7413 (59%)           | 8887 (89%)          | 15 149 (86%)                        | 20 102 (82%)                      | 16 835 (76%)          | 7393 (68%)           |
| Up to 2 times/week                      | 221 (4%)          | 510 (5%)                           | 1072 (7%)                         | 1469 (10%)            | 1732 (14%)           | 427 (4%)            | 980 (6%)                            | 1617 (7%)                         | 2090 (9%)             | 1306 (12%)           |
| Regular, ≥3 times/week                  | 439 (8%)          | 1046 (11%)                         | 2455 (16%)                        | 3161 (21%)            | 3438 (27%)           | 618 (6%)            | 1574 (9%)                           | 2844 (12%)                        | 3125 (14%)            | 2230 (20%)           |
| Anthropometry, blood pressure and HbA1c |                   |                                    |                                   |                       |                      |                     |                                     |                                   |                       |                      |
| Body mass index, kg/m <sup>2</sup>      | 29.3 (5.1)        | 29.4 (5.0)                         | 29.0 (4.9)                        | 28.2 (4.6)            | 27.4 (4.3)           | 29.9 (5.2)          | 30.0 (5.1)                          | 29.8 (5.0)                        | 29.1 (4.9)            | 28.5 (4.6)           |
| Waist circumference, cm                 | 96 (11)           | 95 (11)                            | 93 (11)                           | 91 (11)               | 91 (11)              | 97 (11)             | 97 (11)                             | 95 (11)                           | 94 (12)               | 93 (12)              |
| Hip circumference, cm                   | 105 (11)          | 105 (11)                           | 105 (11)                          | 103 (10)              | 103 (9)              | 106 (11)            | 106 (11)                            | 106 (11)                          | 105 (11)              | 104 (10)             |
| Systolic blood pressure, mmHg           | 136 (19)          | 132 (17)                           | 129 (16)                          | 125 (15)              | 124 (14)             | 132 (18)            | 130 (17)                            | 126 (16)                          | 122 (15)              | 122 (14)             |
| Diastolic blood pressure, mmHg          | 86 (11)           | 86 (10)                            | 84 (10)                           | 83 (10)               | 83 (10)              | 85 (10)             | 84 (10)                             | 83 (10)                           | 81 (10)               | 81 (9)               |
| HbA1c, % ‡                              | 5.7 (1.1)         | 5.7 (1.1)                          | 5.5 (1.0)                         | 5.4 (0.8)             | 5.4 (0.7)            | 5.9 (1.2)           | 5.9 (1.1)                           | 5.7 (1.0)                         | 5.6 (0.9)             | 5.6 (0.8)            |
| Prior diseases #                        |                   |                                    |                                   |                       |                      |                     |                                     |                                   |                       |                      |
| Diabetes                                | 1146 (20%)        | 1721 (17%)                         | 1859 (12%)                        | 1066 (7%)             | 724 (6%)             | 2324 (23%)          | 3507 (20%)                          | 3559 (14%)                        | 1856 (8%)             | 744 (7%)             |
| Cardiovascular disease                  | 222 (4%)          | 332 (3%)                           | 436 (3%)                          | 321 (2%)              | 245 (2%)             | 248 (2%)            | 443 (3%)                            | 471 (2%)                          | 271 (1%)              | 155 (1%)             |
| Cancer                                  | 87 (1%)           | 152 (2%)                           | 231 (2%)                          | 194 (1%)              | 166 (1%)             | 106 (1%)            | 188 (1%)                            | 248 (1%)                          | 208 (1%)              | 89 (1%)              |
| Other **                                | 719 (12%)         | 1268 (13%)                         | 1977 (13%)                        | 1581 (11%)            | 1101 (9%)            | 623 (6%)            | 1272 (7%)                           | 1584 (6%)                         | 1108 (5%)             | 520 (5%)             |

Results shown are frequencies (column percentages) or mean (standard deviation); HbA1c = haemoglobin A1c.

\* Same exclusions applied as described in Table 1

† Median (interquartile range): 49.5 years (41.5, 58.5) for residents of Coyoacán, 48.5 years (41.5, 58.5) for residents of Iztapalapa

†† Higher scores represent higher area-based social development.

\$ Collection of data on social security was commenced part way through recruitment. The percentages shown relate to participants who were asked this question, all of whom resided in Iztapalapa.

‡ HbA1c among participants without previously-diagnosed diabetes.

# Self-reported diseases.

\*\* Other diseases include emphysema, chronic kidney disease, peptic ulcer, cirrhosis, and peripheral arterial disease.

**Table S3. Education reported at baseline and resurvey among 2971 men and 6970 women resurveyed 16 years later\***

| Reported at baseline | Reported at resurvey |                                 |                               |                      |                   | Total<br>(9 941) |
|----------------------|----------------------|---------------------------------|-------------------------------|----------------------|-------------------|------------------|
|                      | None<br>(1 358)      | Primary - incomplete<br>(2 214) | Primary - complete<br>(2 701) | Secondary<br>(3 001) | Tertiary<br>(667) |                  |
| None                 | 882 (65%)            | 204 (9%)                        | 44 (2%)                       | 9 (<0.5%)            | 6 (1%)            | 1145 (12%)       |
| Primary - incomplete | 371 (27%)            | 1602 (72%)                      | 224 (8%)                      | 50 (2%)              | 6 (1%)            | 2253 (23%)       |
| Primary - complete   | 68 (5%)              | 363 (16%)                       | 2192 (81%)                    | 404 (13%)            | 23 (3%)           | 3050 (31%)       |
| Secondary            | 21 (2%)              | 38 (2%)                         | 212 (8%)                      | 1966 (66%)           | 89 (13%)          | 2326 (23%)       |
| Tertiary             | 16 (1%)              | 7 (<0.5%)                       | 29 (1%)                       | 572 (19%)            | 543 (81%)         | 1167 (12%)       |

\*Kappa=0.64. This describes the agreement between recruitment and resurvey values.  
Frequencies and column percentages are presented.

**Table S4. Relevance of education to mortality from any cause at ages 35-74 years during the first 10 years of follow-up vs. subsequent years of follow-up combined**

| <b>Education attained</b> | <b>First 10 years of follow-up</b> |                    | <b>Subsequent follow-up</b> |                    |
|---------------------------|------------------------------------|--------------------|-----------------------------|--------------------|
|                           | <b>Deaths</b>                      | <b>HR (95% CI)</b> | <b>Deaths</b>               | <b>HR (95% CI)</b> |
| None                      | 1206                               | 1.76 (1.66, 1.86)  | 609                         | 1.77 (1.63, 1.92)  |
| Primary-incomplete        | 1986                               | 1.71 (1.64, 1.79)  | 1328                        | 1.75 (1.66, 1.85)  |
| Primary-complete          | 2093                               | 1.53 (1.47, 1.60)  | 2070                        | 1.67 (1.60, 1.75)  |
| Secondary                 | 1247                               | 1.28 (1.21, 1.35)  | 1507                        | 1.38 (1.31, 1.45)  |
| Tertiary                  | 658                                | 1.00 (0.92, 1.08)  | 798                         | 1.00 (0.93, 1.07)  |

**Table S5. Associations of education with all-cause and cause-specific mortality after adjustment for potential mediators**

| Mortality causes           | Education attained   | Basic adjustment* |                   | Adjusted for measured mediators † |                  | %reduction     |        |
|----------------------------|----------------------|-------------------|-------------------|-----------------------------------|------------------|----------------|--------|
|                            |                      | RR (95% CI)       | x <sup>2</sup> †† | RR (95% CI)                       | x <sup>2</sup> § | x <sup>2</sup> | Log RR |
| All-cause                  | Tertiary             | 1.00 (0.95, 1.05) | 446.1             | 1.00 (0.95, 1.06)                 | 70.1             | 84             | 74     |
|                            | Secondary            | 1.34 (1.28, 1.39) |                   | 1.20 (1.15, 1.25)                 |                  |                |        |
|                            | Primary - Complete   | 1.62 (1.57, 1.67) |                   | 1.28 (1.25, 1.32)                 |                  |                |        |
|                            | Primary - Incomplete | 1.78 (1.72, 1.85) |                   | 1.25 (1.21, 1.30)                 |                  |                |        |
|                            | None                 | 1.84 (1.76, 1.93) |                   | 1.17 (1.12, 1.23)                 |                  |                |        |
| Vascular                   | Tertiary             | 1.00 (0.90, 1.11) | 87.1              | 1.00 (0.90, 1.11)                 | 26.9             | 69             | 102    |
|                            | Secondary            | 1.35 (1.26, 1.46) |                   | 1.20 (1.11, 1.29)                 |                  |                |        |
|                            | Primary - Complete   | 1.60 (1.51, 1.69) |                   | 1.24 (1.17, 1.32)                 |                  |                |        |
|                            | Primary - Incomplete | 1.65 (1.54, 1.76) |                   | 1.12 (1.05, 1.20)                 |                  |                |        |
|                            | None                 | 1.63 (1.49, 1.79) |                   | 0.99 (0.90, 1.09)                 |                  |                |        |
| Cardiac                    | Tertiary             | 1.00 (0.89, 1.12) | 44.4              | 1.00 (0.89, 1.13)                 | 14.3             | 68             | 118    |
|                            | Secondary            | 1.28 (1.18, 1.40) |                   | 1.14 (1.04, 1.25)                 |                  |                |        |
|                            | Primary - Complete   | 1.48 (1.38, 1.58) |                   | 1.16 (1.08, 1.24)                 |                  |                |        |
|                            | Primary - Incomplete | 1.52 (1.41, 1.65) |                   | 1.06 (0.98, 1.15)                 |                  |                |        |
|                            | None                 | 1.49 (1.33, 1.66) |                   | 0.93 (0.83, 1.04)                 |                  |                |        |
| Stroke                     | Tertiary             | 1.00 (0.78, 1.28) | 48.3              | 1.00 (0.77, 1.29)                 | 15.7             | 67             | 74     |
|                            | Secondary            | 1.53 (1.29, 1.80) |                   | 1.33 (1.12, 1.57)                 |                  |                |        |
|                            | Primary - Complete   | 2.19 (1.94, 2.46) |                   | 1.63 (1.45, 1.83)                 |                  |                |        |
|                            | Primary - Incomplete | 2.19 (1.90, 2.51) |                   | 1.38 (1.20, 1.59)                 |                  |                |        |
|                            | None                 | 2.28 (1.89, 2.75) |                   | 1.24 (1.02, 1.50)                 |                  |                |        |
| Hepatobiliary              | Tertiary             | 1.00 (0.85, 1.18) | 86.6              | 1.00 (0.84, 1.19)                 | 22.8             | 74             | 51     |
|                            | Secondary            | 1.15 (1.00, 1.31) |                   | 1.04 (0.91, 1.19)                 |                  |                |        |
|                            | Primary - Complete   | 1.48 (1.33, 1.65) |                   | 1.21 (1.08, 1.35)                 |                  |                |        |
|                            | Primary - Incomplete | 2.07 (1.85, 2.33) |                   | 1.48 (1.32, 1.67)                 |                  |                |        |
|                            | None                 | 2.31 (1.97, 2.71) |                   | 1.51 (1.28, 1.78)                 |                  |                |        |
| Renal                      | Tertiary             | 1.00 (0.84, 1.19) | 285.5             | 1.00 (0.84, 1.19)                 | 59.2             | 79             | 67     |
|                            | Secondary            | 1.94 (1.75, 2.15) |                   | 1.55 (1.39, 1.72)                 |                  |                |        |
|                            | Primary - Complete   | 3.11 (2.90, 3.34) |                   | 1.92 (1.79, 2.06)                 |                  |                |        |
|                            | Primary - Incomplete | 3.59 (3.31, 3.89) |                   | 1.78 (1.64, 1.93)                 |                  |                |        |
|                            | None                 | 3.58 (3.19, 4.01) |                   | 1.52 (1.35, 1.71)                 |                  |                |        |
| Cancer #                   | Tertiary             | 1.00 (0.89, 1.12) | 7.6               | 1.00 (0.89, 1.13)                 | 8.3              |                |        |
|                            | Secondary            | 1.03 (0.94, 1.13) |                   | 1.02 (0.93, 1.12)                 |                  |                |        |
|                            | Primary - Complete   | 1.10 (1.02, 1.19) |                   | 1.07 (0.99, 1.15)                 |                  |                |        |
|                            | Primary - Incomplete | 1.13 (1.03, 1.23) |                   | 1.07 (0.97, 1.17)                 |                  |                |        |
|                            | None                 | 0.95 (0.83, 1.08) |                   | 0.87 (0.76, 1.00)                 |                  |                |        |
| Respiratory                | Tertiary             | 1.00 (0.87, 1.15) | 29.2              | 1.00 (0.86, 1.16)                 | 14.3             | 51             | 82     |
|                            | Secondary            | 1.49 (1.35, 1.65) |                   | 1.32 (1.20, 1.46)                 |                  |                |        |
|                            | Primary - Complete   | 1.48 (1.36, 1.61) |                   | 1.19 (1.09, 1.29)                 |                  |                |        |
|                            | Primary - Incomplete | 1.47 (1.33, 1.62) |                   | 1.09 (0.98, 1.21)                 |                  |                |        |
|                            | None                 | 1.54 (1.35, 1.76) |                   | 1.08 (0.94, 1.23)                 |                  |                |        |
| Infective                  | Tertiary             | 1.00 (0.80, 1.25) | 55.1              | 1.00 (0.79, 1.26)                 | 11.5             | 79             | 49     |
|                            | Secondary            | 1.56 (1.34, 1.81) |                   | 1.39 (1.19, 1.62)                 |                  |                |        |
|                            | Primary - Complete   | 1.87 (1.66, 2.12) |                   | 1.45 (1.28, 1.63)                 |                  |                |        |
|                            | Primary - Incomplete | 2.15 (1.87, 2.46) |                   | 1.46 (1.27, 1.68)                 |                  |                |        |
|                            | None                 | 2.67 (2.24, 3.17) |                   | 1.65 (1.38, 1.97)                 |                  |                |        |
| Other/ill-defined/External | Tertiary             | 1.00 (0.80, 1.25) | 27.5              | 1.00 (0.80, 1.26)                 | 4.3              | 84             | 59     |
|                            | Secondary            | 1.14 (0.96, 1.35) |                   | 1.05 (0.89, 1.25)                 |                  |                |        |
|                            | Primary - Complete   | 1.28 (1.11, 1.47) |                   | 1.06 (0.92, 1.22)                 |                  |                |        |
|                            | Primary - Incomplete | 1.51 (1.29, 1.77) |                   | 1.11 (0.95, 1.30)                 |                  |                |        |
|                            | None                 | 2.02 (1.67, 2.43) |                   | 1.33 (1.09, 1.62)                 |                  |                |        |

\*Adjusted for sex.

† Adjusted for smoking status, alcohol consumption frequency, leisure time physical activity, diabetes status, adiposity (weight, height, waist and hip circumference) and systolic blood pressure.

†† Degrees of freedom: 5.

§ Degrees of freedom: 24.

|| Results are not shown for deaths attributed to acute diabetic crises, because all such deaths were due to diabetes.

# Percentage reduction in x<sup>2</sup> and log RR not estimated, because there was little association between education and cancer death.

**Table S6. Baseline characteristics of 46 674 men aged 35-74 years by reported income at recruitment**

|                                         | Income (pesos/month)     |                  |                        |                       |                   |
|-----------------------------------------|--------------------------|------------------|------------------------|-----------------------|-------------------|
|                                         | None reported<br>(5 031) | <1500<br>(9 062) | 1500-<3000<br>(12 628) | 3000-<4500<br>(9 866) | ≥4500<br>(10 087) |
| Age, years †                            | 56.5 (11.3)              | 56.1 (11.7)      | 50.7 (10.8)            | 48.6 (9.7)            | 47.9 (9.1)        |
| Resident of Coyoacán                    | 1470 (29%)               | 4321 (48%)       | 5759 (46%)             | 3797 (38%)            | 5236 (52%)        |
| Tertiary education attained             | 808 (16%)                | 747 (8%)         | 1526 (12%)             | 2528 (26%)            | 6110 (61%)        |
| Income, pesos/month                     | 0 (0)                    | 917 (397)        | 2056 (394)             | 3480 (455)            | 9350 (9326)       |
| Social Development Index ††             | 0.74 (0.10)              | 0.74 (0.09)      | 0.74 (0.09)            | 0.75 (0.10)           | 0.81 (0.11)       |
| Smoking status                          |                          |                  |                        |                       |                   |
| Current smoker                          | 2247 (45%)               | 4360 (48%)       | 6748 (53%)             | 5392 (55%)            | 5047 (50%)        |
| Ex-smoker                               | 1650 (33%)               | 3003 (33%)       | 3537 (28%)             | 2577 (26%)            | 2710 (27%)        |
| Never smoker                            | 1134 (23%)               | 1699 (19%)       | 2343 (19%)             | 1897 (19%)            | 2330 (23%)        |
| Drinking behaviour                      |                          |                  |                        |                       |                   |
| Current drinker                         | 3307 (66%)               | 6509 (72%)       | 9811 (78%)             | 7982 (81%)            | 8608 (85%)        |
| Former drinker                          | 1238 (25%)               | 1973 (22%)       | 2134 (17%)             | 1387 (14%)            | 975 (10%)         |
| Never drinker                           | 486 (10%)                | 580 (6%)         | 683 (5%)               | 497 (5%)              | 504 (5%)          |
| Leisure-time physical activity          |                          |                  |                        |                       |                   |
| None                                    | 3754 (75%)               | 6846 (76%)       | 9153 (72%)             | 6747 (68%)            | 6033 (60%)        |
| Up to 2 times/week                      | 428 (9%)                 | 855 (9%)         | 1743 (14%)             | 1591 (16%)            | 1763 (17%)        |
| Regular, ≥3 times/week                  | 849 (17%)                | 1361 (15%)       | 1732 (14%)             | 1528 (15%)            | 2291 (23%)        |
| Anthropometry, blood pressure and HbA1c |                          |                  |                        |                       |                   |
| Body mass index, kg/m <sup>2</sup>      | 27.7 (4.5)               | 27.8 (4.3)       | 28.1 (4.2)             | 28.2 (4.1)            | 28.1 (4.0)        |
| Waist circumference, cm                 | 97 (11)                  | 96 (11)          | 96 (10)                | 96 (10)               | 97 (10)           |
| Hip circumference, cm                   | 101 (9)                  | 100 (8)          | 101 (8)                | 102 (8)               | 102 (8)           |
| Systolic blood pressure, mmHg           | 130 (17)                 | 131 (16)         | 128 (16)               | 127 (14)              | 126 (14)          |
| Diastolic blood pressure, mmHg          | 85 (10)                  | 85 (10)          | 85 (10)                | 84 (10)               | 84 (9)            |
| HbA1c, %                                | 5.7 (1.1)                | 5.7 (1.1)        | 5.7 (1.0)              | 5.6 (1.0)             | 5.6 (0.9)         |
| Prior diseases #                        |                          |                  |                        |                       |                   |
| Diabetes                                | 1044 (21%)               | 1461 (16%)       | 1625 (13%)             | 1065 (11%)            | 894 (9%)          |
| Cardiovascular disease                  | 206 (4%)                 | 362 (4%)         | 296 (2%)               | 181 (2%)              | 217 (2%)          |
| Cancer                                  | 40 (1%)                  | 67 (1%)          | 50 (<0.5%)             | 38 (<0.5%)            | 50 (<0.5%)        |
| Other **                                | 351 (7%)                 | 537 (6%)         | 566 (4%)               | 419 (4%)              | 455 (5%)          |

Results shown are frequencies (column percentages) or mean (standard deviation); HbA1c = haemoglobin A1c.

\* Same exclusions applied as described in Table 1

† Median (interquartile range) for men: 50.5 years (41.5, 59.5)

†† Higher scores represent higher area-based social development.

\$ HbA1c among participants without previously-diagnosed diabetes.

|| Self-reported diseases.

# Other diseases include emphysema, chronic kidney disease, peptic ulcer, cirrhosis, and peripheral arterial disease.



Figure S1. Relevance of education to mortality from any cause at ages 35–74 years, by sex

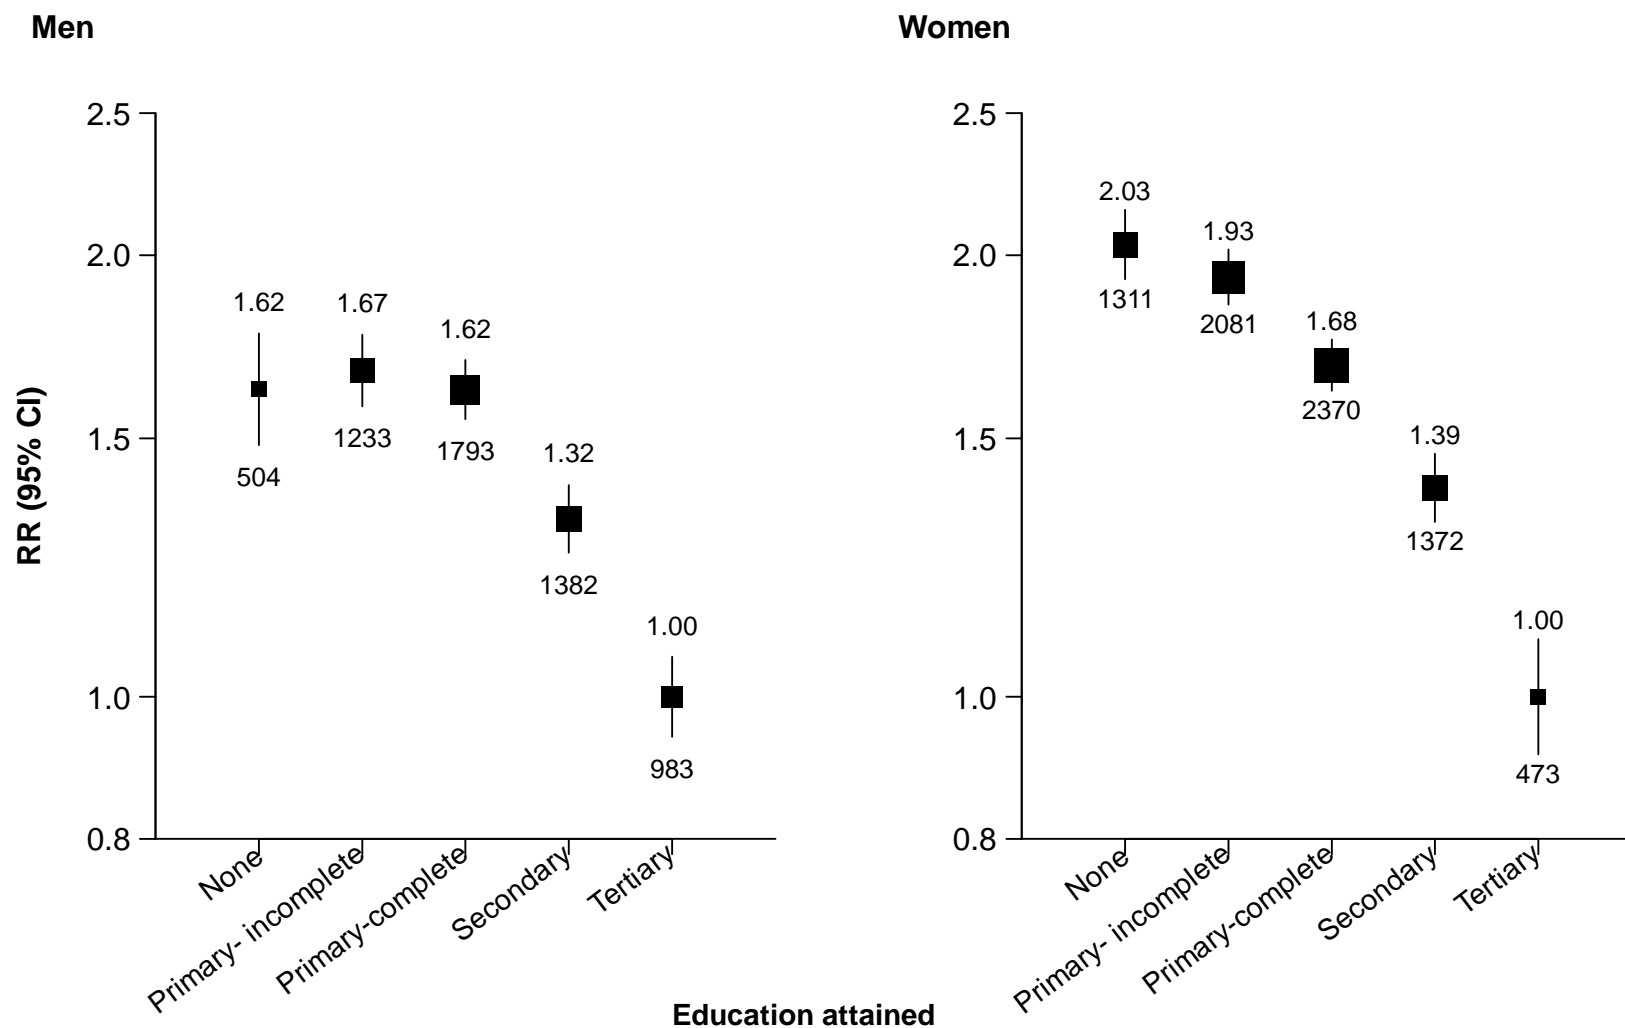

Rate ratios (RRs) are stratified by age-at-risk. The numbers above the squares are the RRs and the numbers below the squares are the number of deaths in that group. The size of each square is proportional to the amount of data available. The error bars represent 95% confidence intervals.

**Figure S2. Relevance of education to cause-specific mortality among women at ages 35–74 years**

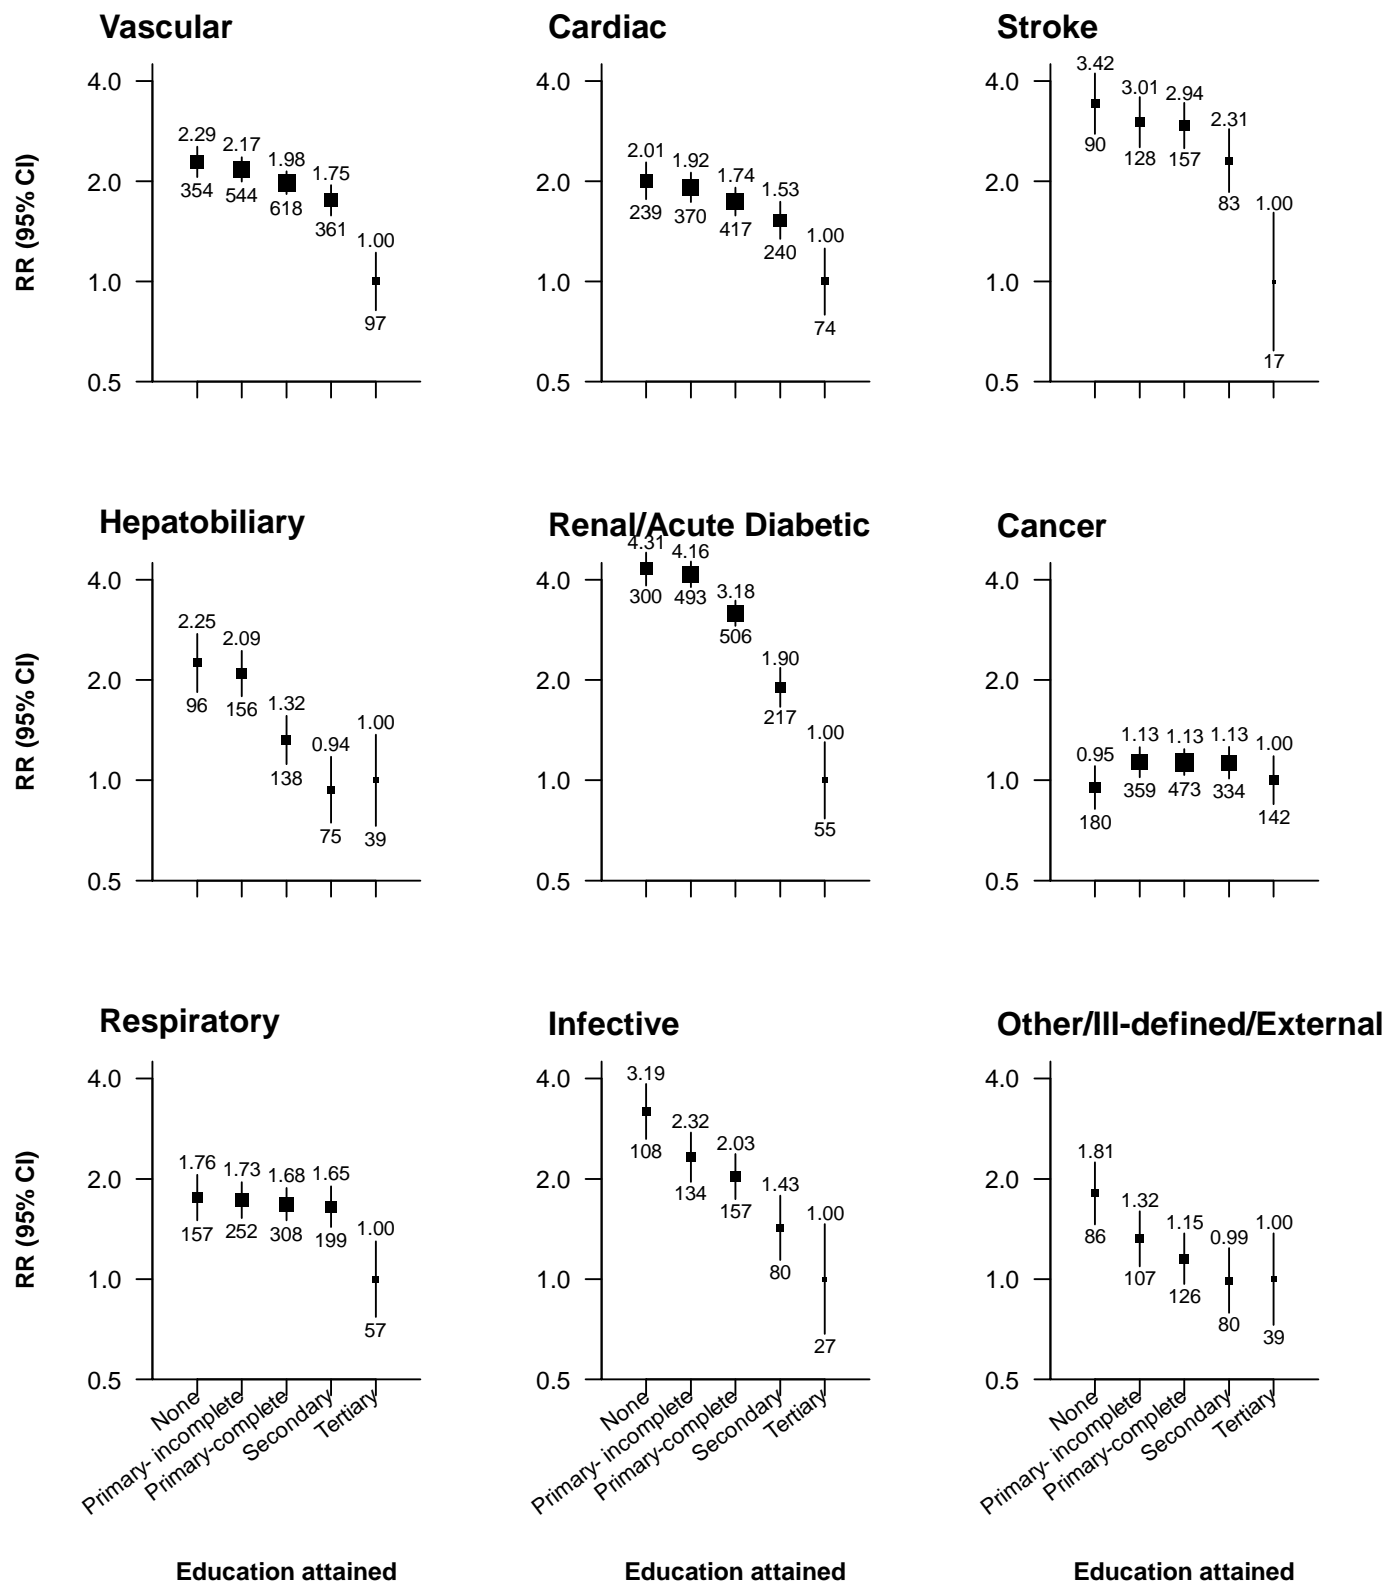

Rate ratios (RRs) are stratified by age-at-risk. The numbers above the squares are the RRs and the numbers below the squares are the number of deaths in that group. The size of each square is proportional to the amount of data available. The error bars represent 95% confidence intervals.

**Figure S3. Relevance of education to cause-specific mortality among men at ages 35–74 years**

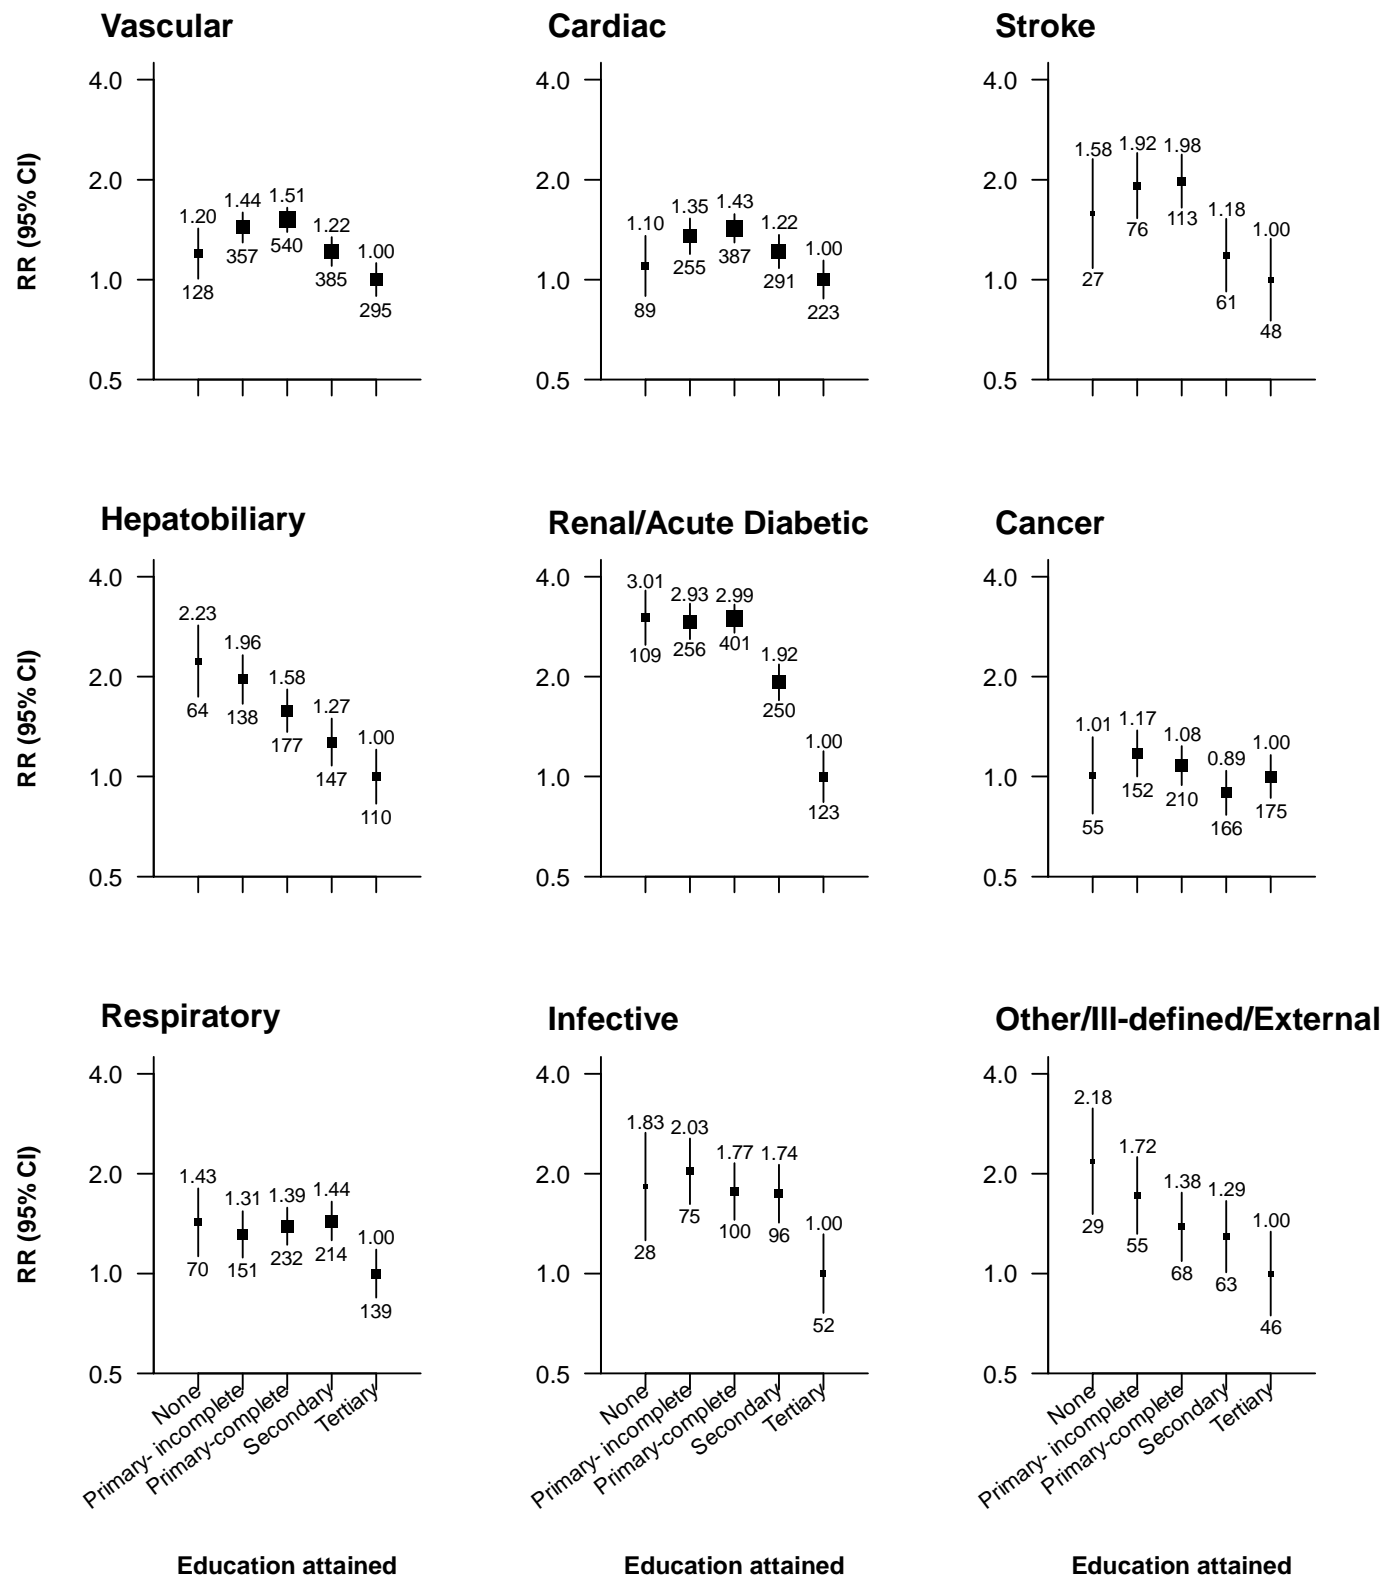

Rate ratios (RRs) are stratified by age-at-risk. The numbers above the squares are the RRs and the numbers below the squares are the number of deaths in that group. The size of each square is proportional to the amount of data available. The error bars represent 95% confidence intervals.

Figure S4. Relevance of education to mortality from any cause at ages 75–84 years

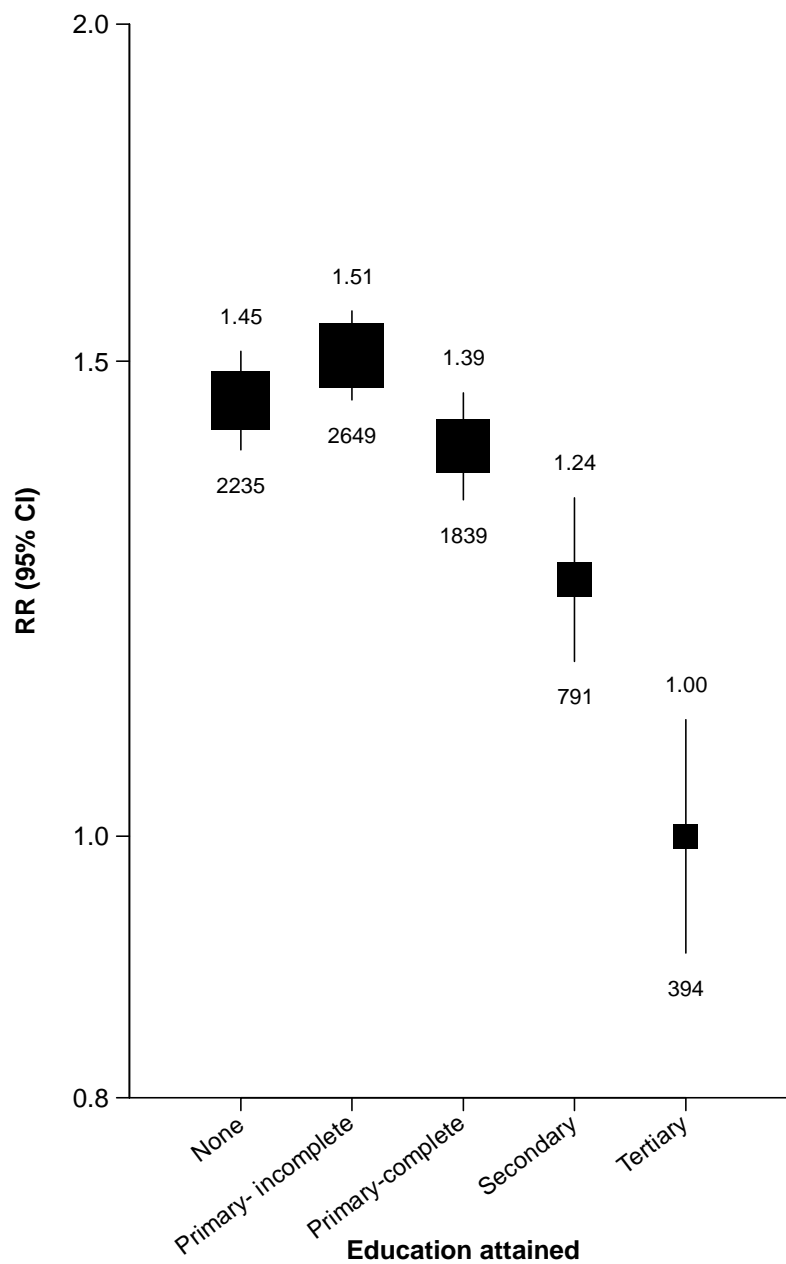

Rate ratios (RRs) are stratified by age-at-risk and sex. The numbers above the squares are the RRs and the numbers below the squares are the number of deaths in that group. The size of each square is proportional to the amount of data available. The error bars represent 95% confidence intervals.

**Figure S5. Relevance of education to cause-specific mortality at ages 75–84 years**

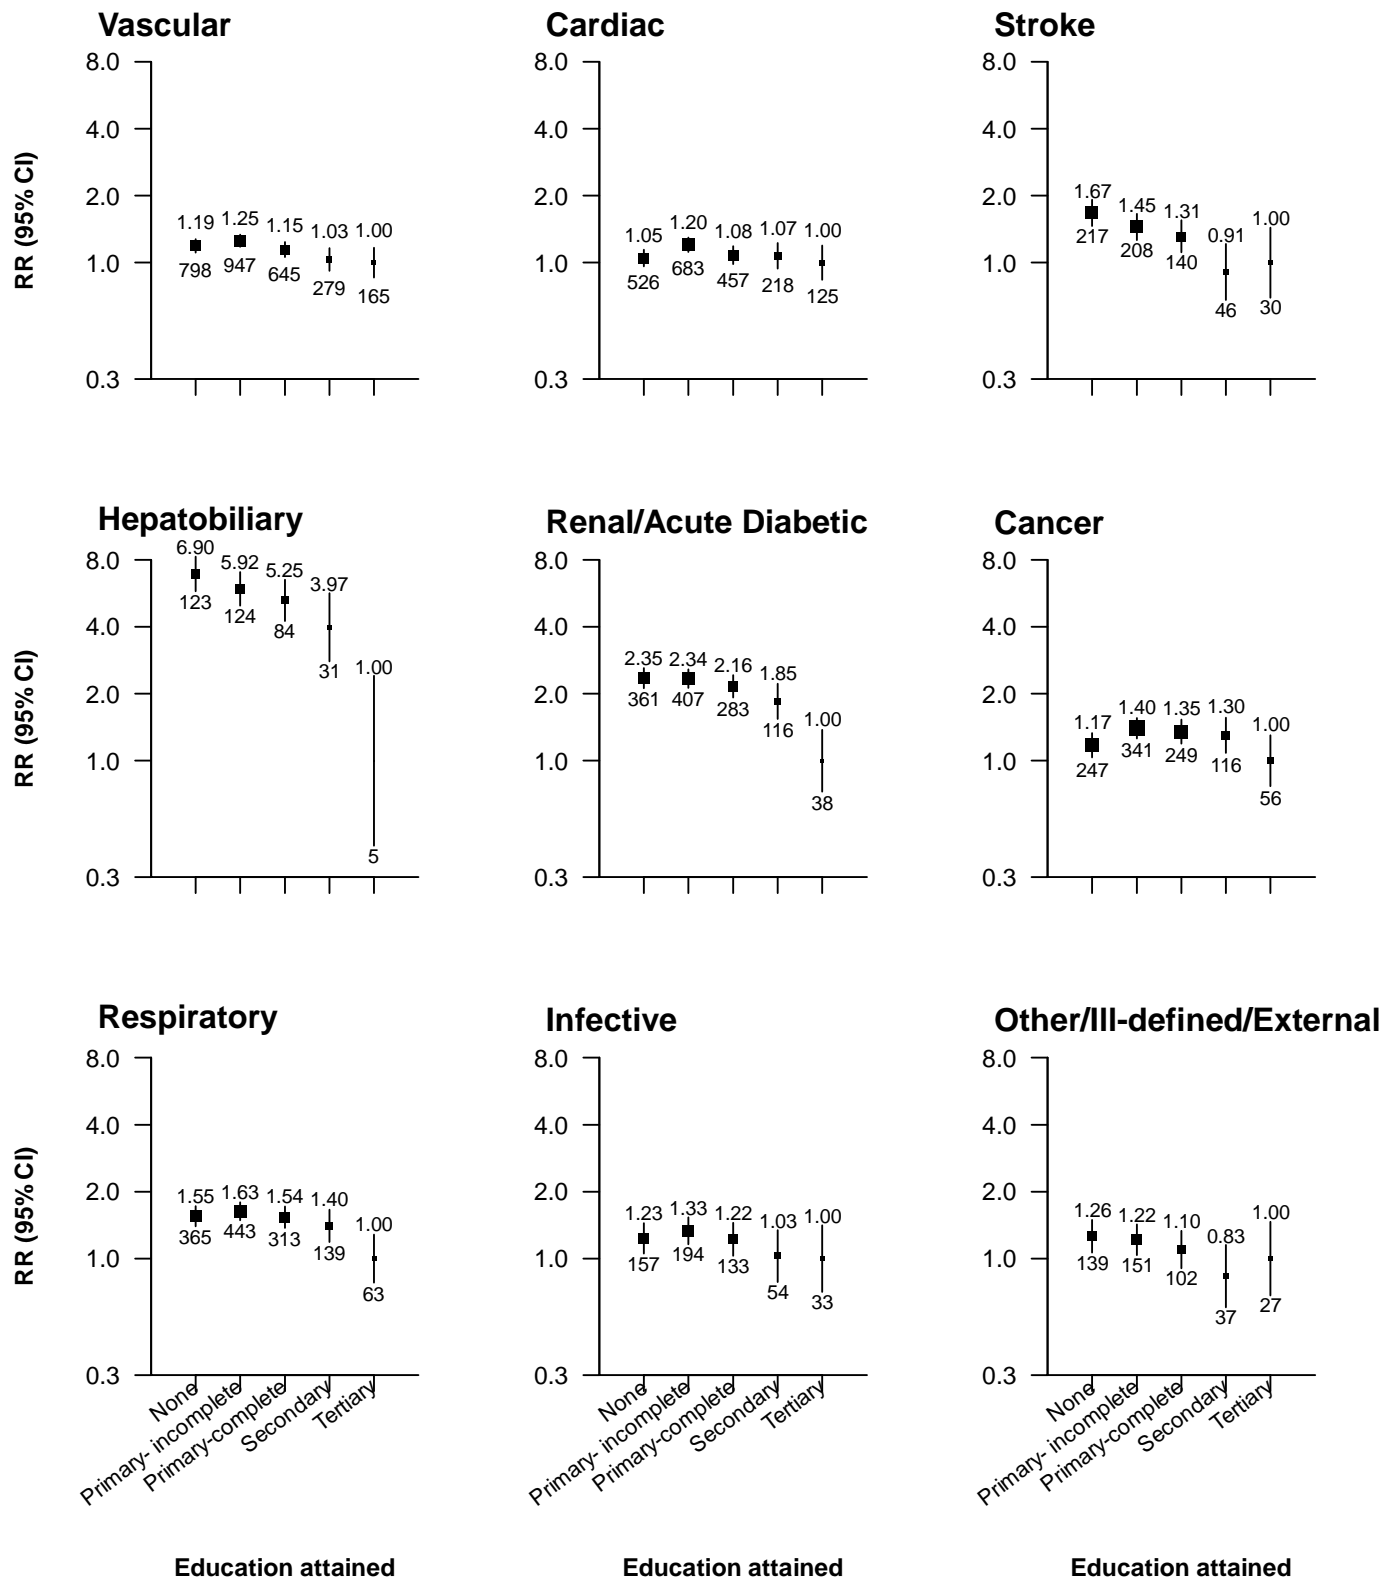

Rate ratios (RRs) are stratified by age-at-risk and sex. The numbers above the squares are the RRs and the numbers below the squares are the number of deaths in that group. The size of each square is proportional to the amount of data available. The error bars represent 95% confidence intervals.

**Figure S6. Relevance of income to mortality from any cause among men at ages 35-74 years**

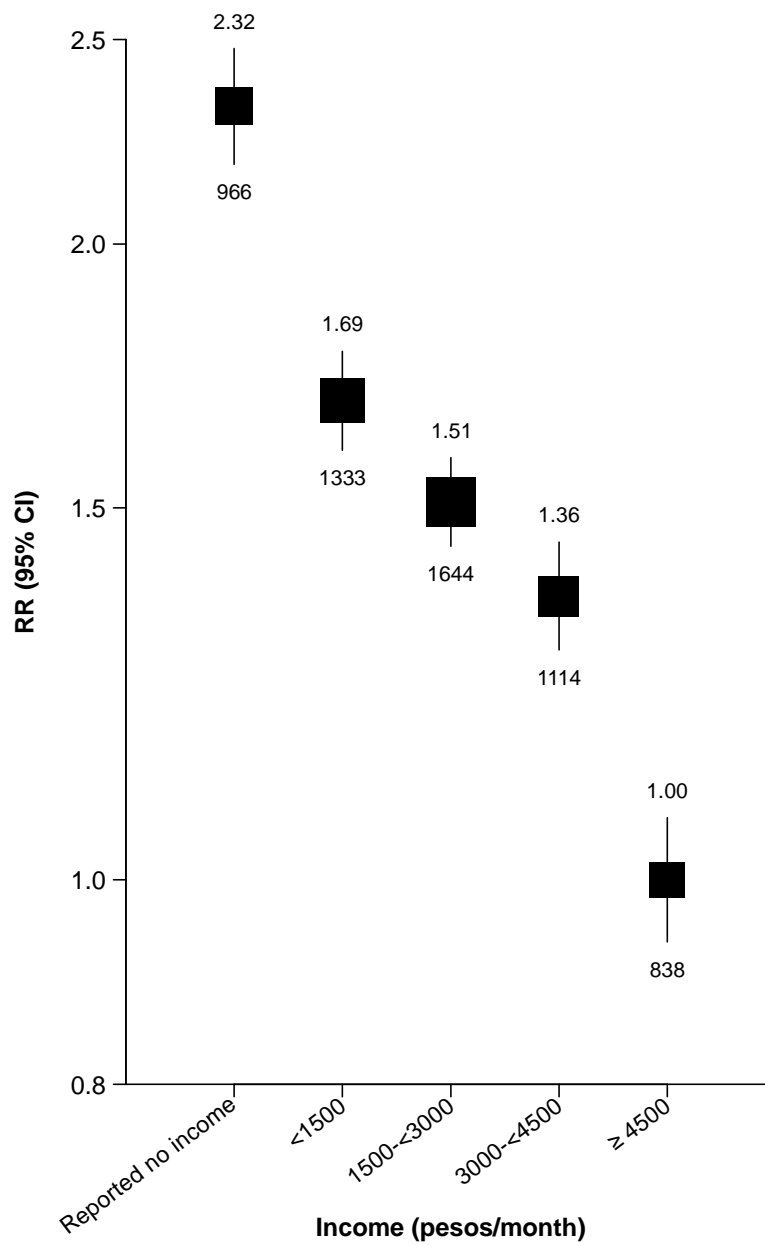

Rate ratios (RRs) are stratified by age-at-risk. The numbers above the squares are the RRs and the numbers below the squares are the number of deaths in that group. The size of each square is proportional to the amount of data available. The error bars represent 95% confidence intervals.

**Figure S7. Relevance of income to cause-specific mortality among men at ages 35–74 years**

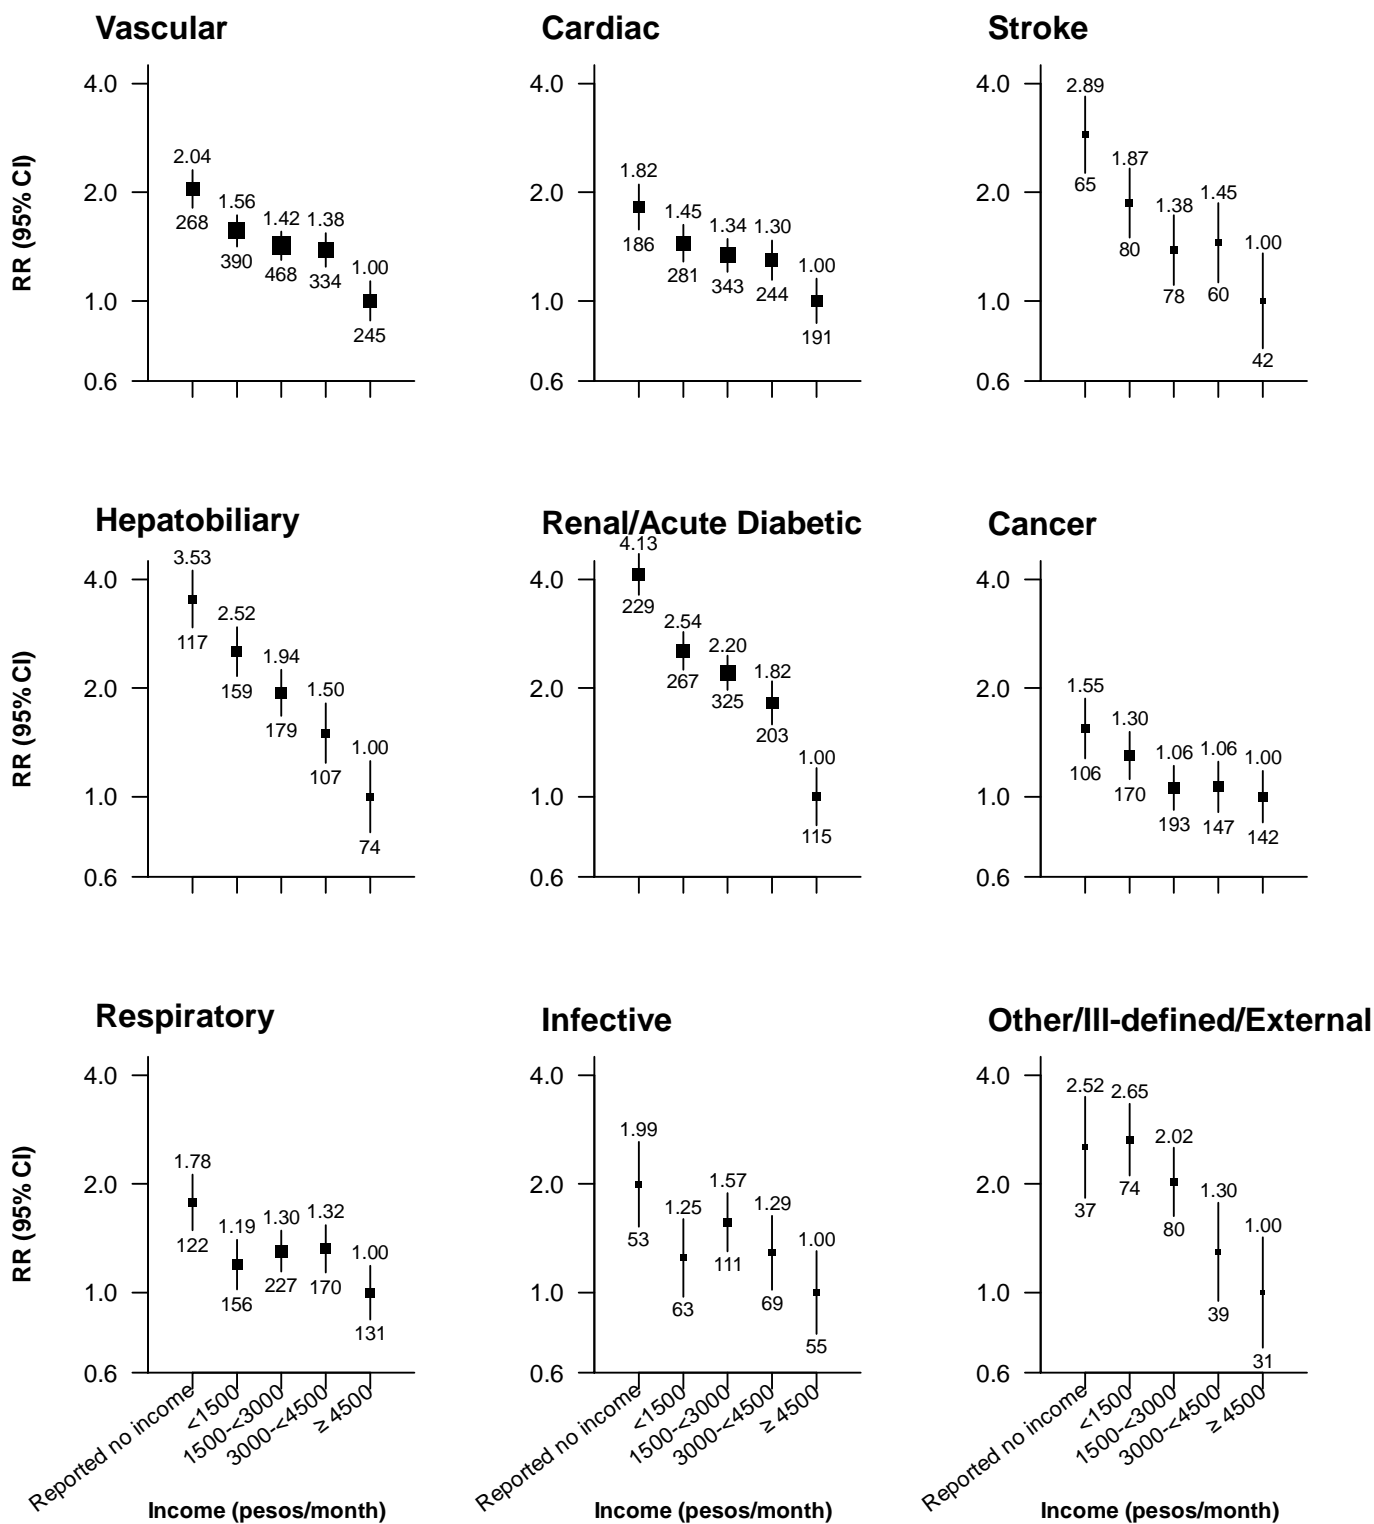

Rate ratios (RRs) are stratified by age-at-risk. The numbers above the squares are the RRs and the numbers below the squares are the number of deaths in that group. The size of each square is proportional to the amount of data available. The error bars represent 95% confidence intervals.

**Figure S8. Relevance of Social Development Index to mortality from any cause at ages 35–74 years**

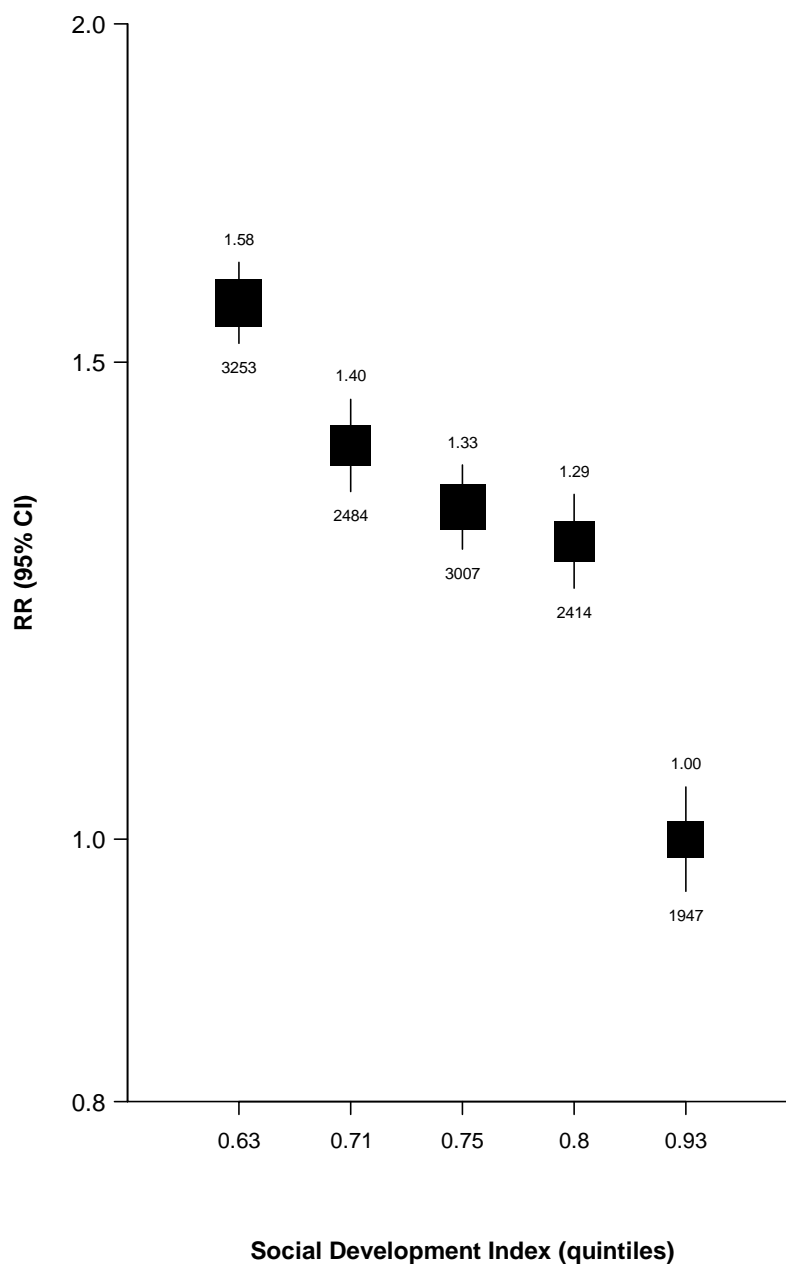

Rate ratios (RRs) are stratified by age-at-risk and sex. The numbers above the squares are the RRs and the numbers below the squares are the number of deaths in that group. The size of each square is proportional to the amount of data available. The error bars represent 95% confidence intervals.



Figure S9. Relevance of Social Development Index to mortality from any cause at ages 35–74 years, by sex

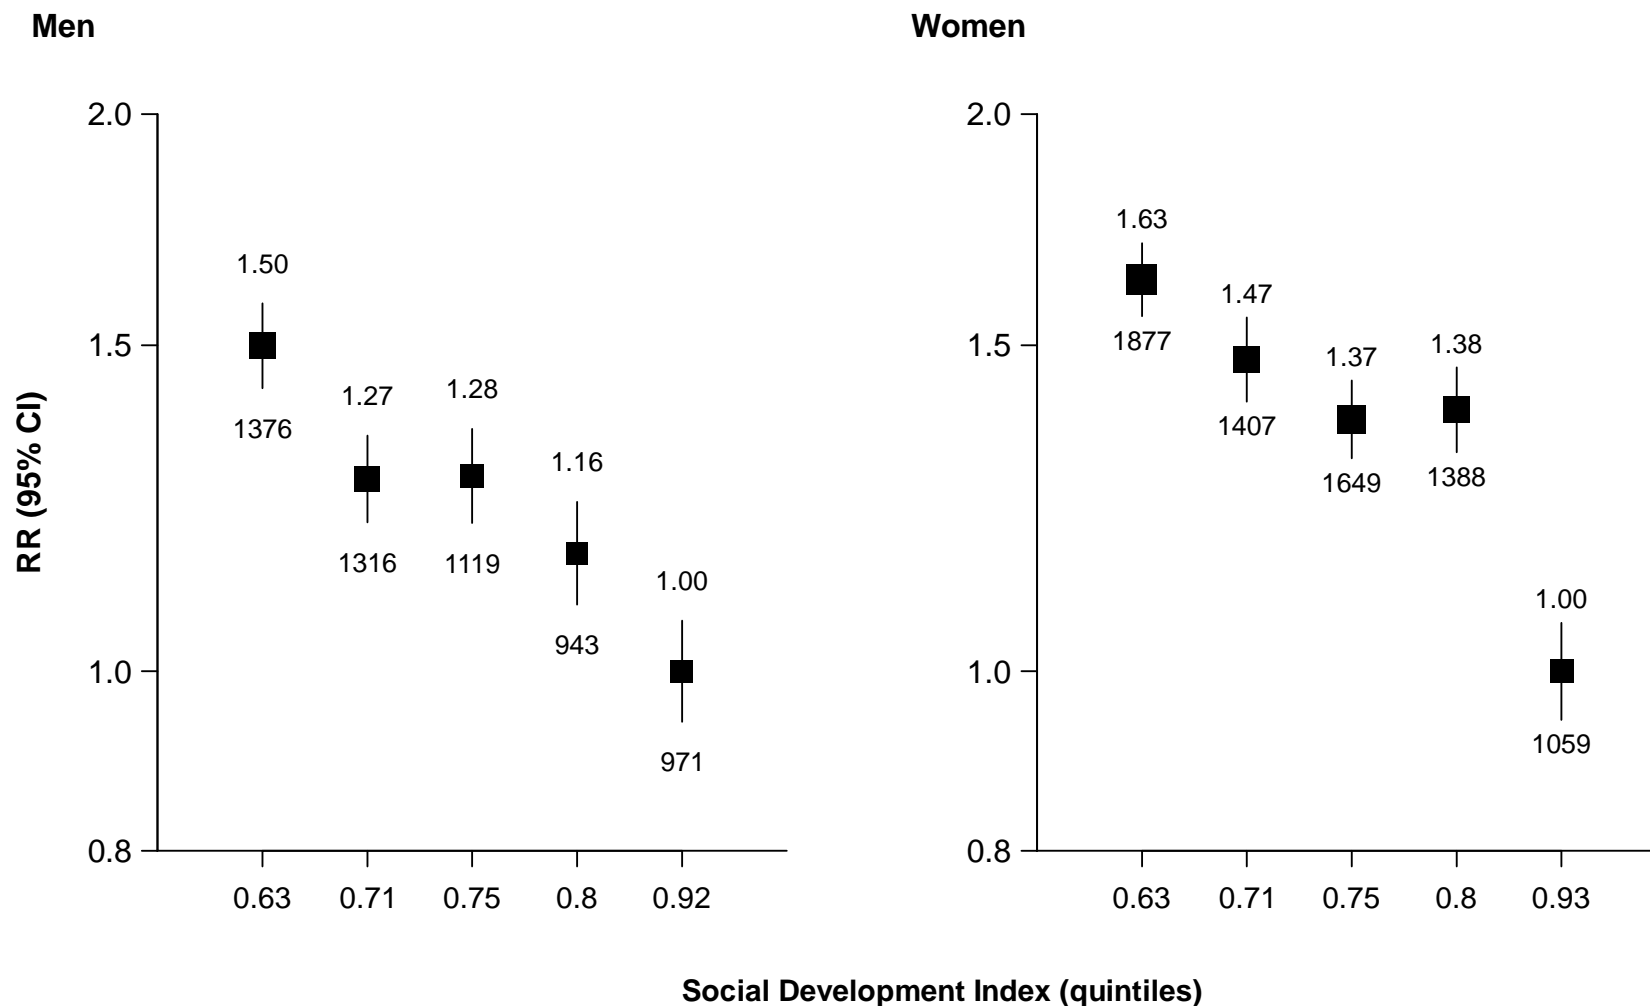

Rate ratios (RRs) are stratified by age-at-risk. The numbers above the squares are the RRs and the numbers below the squares are the number of deaths in that group. The size of each square is proportional to the amount of data available. The error bars represent 95% confidence intervals.

**Figure S10. Relevance of Social Development Index to cause-specific mortality at ages 35–74 years**

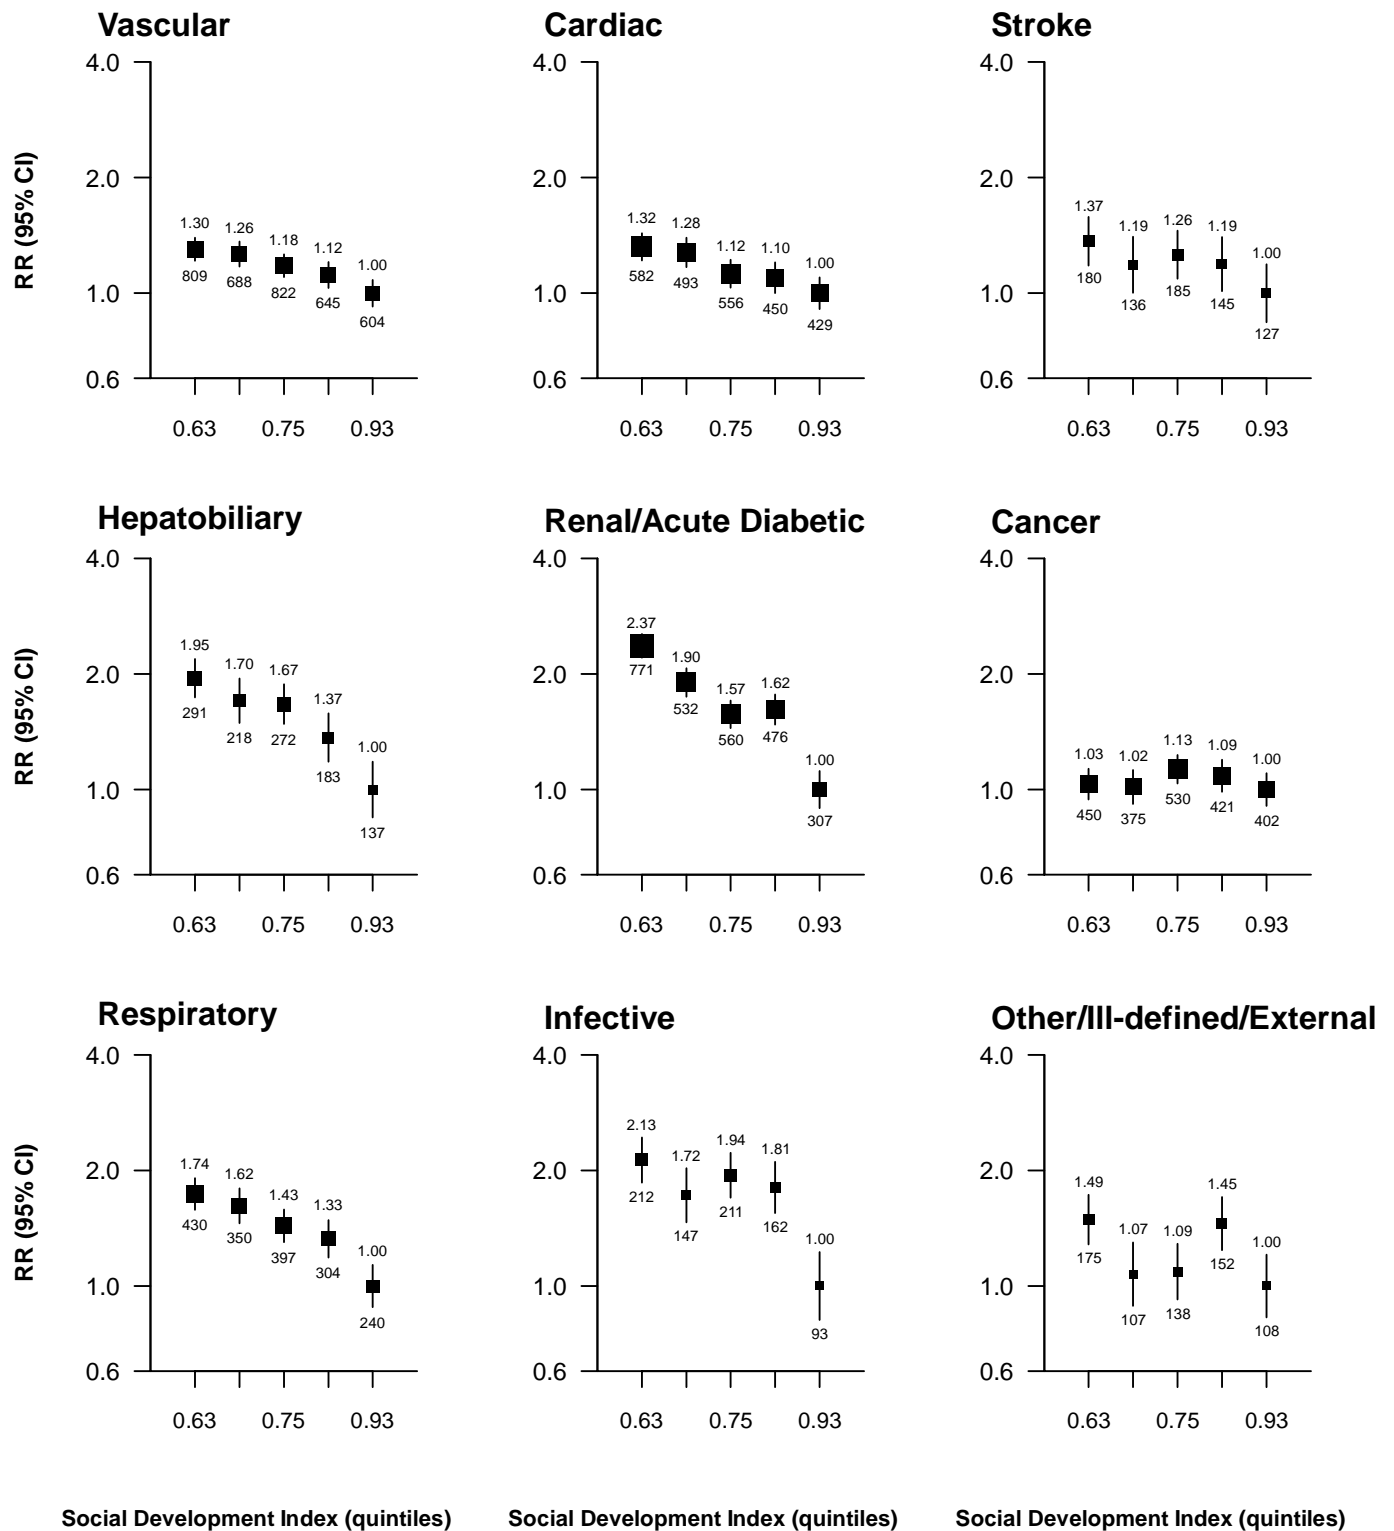

Rate ratios (RRs) are stratified by age-at-risk and sex. The numbers above the squares are the RRs and the numbers below the squares are the number of deaths in that group. The size of each square is proportional to the amount of data available. The error bars represent 95% confidence intervals.
